# Supplementary material for: ATP synthase hexamer assemblies shape cristae of Toxoplasma mitochondria
Source: PubMed Central journal article supplement (PMC7785744; doi:10.1038/s41467-020-20381-z), 2021-01-05
Supplement: 41467_2020_20381_MOESM1_ESM.pdf [file 41467_2020_20381_MOESM1_ESM.pdf]

## Supplementary Information

### **ATP synthase hexamer assemblies shape cristae of *Toxoplasma* mitochondria**

Alexander Mühleip<sup>1,2†</sup>, Rasmus Kock Flygaard<sup>1,2†</sup>, Jana Ovciarikova<sup>3</sup>, Alice Lacombe<sup>3</sup>, Paula Fernandes<sup>1,2,3</sup>, Lilach Sheiner<sup>3\*</sup>, Alexey Amunts<sup>1,2\*</sup>

<sup>1</sup> Science for Life Laboratory, Department of Biochemistry and Biophysics, Stockholm University, 17165 Solna, Sweden.

<sup>2</sup> Department of Medical Biochemistry and Biophysics, Karolinska Institute, 17177 Stockholm, Sweden.

<sup>3</sup> Wellcome Centre for Integrative Parasitology, University of Glasgow, UK.

† These authors contributed equally to this work.

\* email: [lilach.sheiner@glasgow.ac.uk](mailto:lilach.sheiner@glasgow.ac.uk), [amunts@scilifelab.se](mailto:amunts@scilifelab.se)

#### **This file includes:**

Supplementary Figures 1 to 15

Supplementary Tables 1 to 3

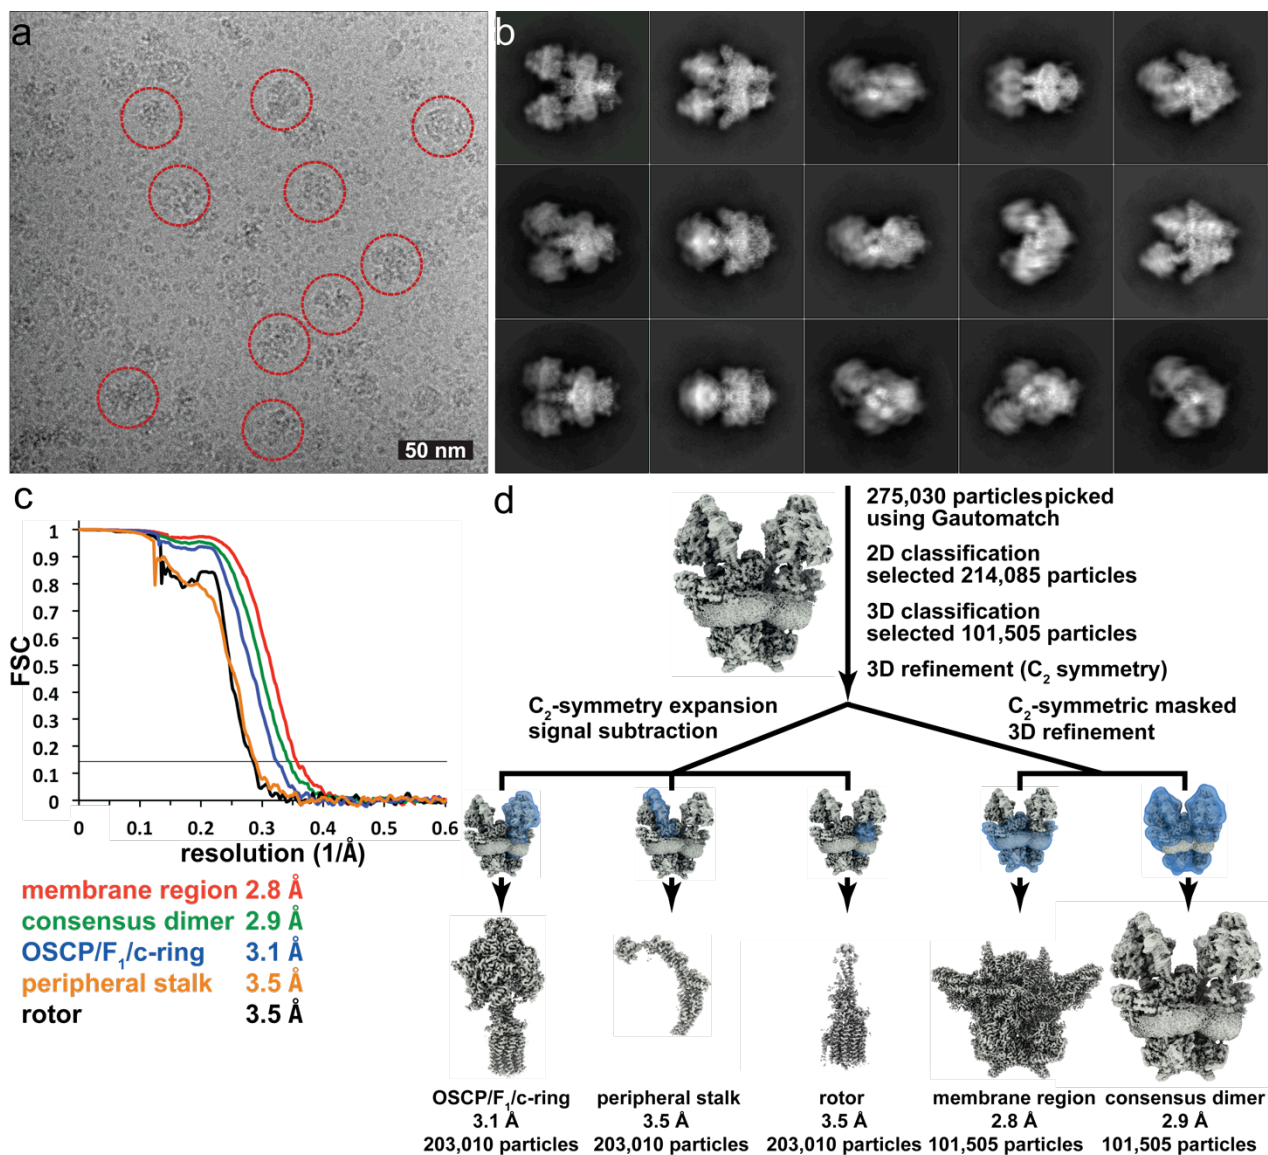

**Supplementary Fig. 1 | Cryo-EM data processing of the *T. gondii* ATP synthase dimer.**

**a** Representative micrograph. **b** 2D class averages. **c** Fourier Shell Correlation (FSC) curves showing the estimated resolutions of ATP synthase dimer maps. **d** Data processing scheme resulting in five final maps.

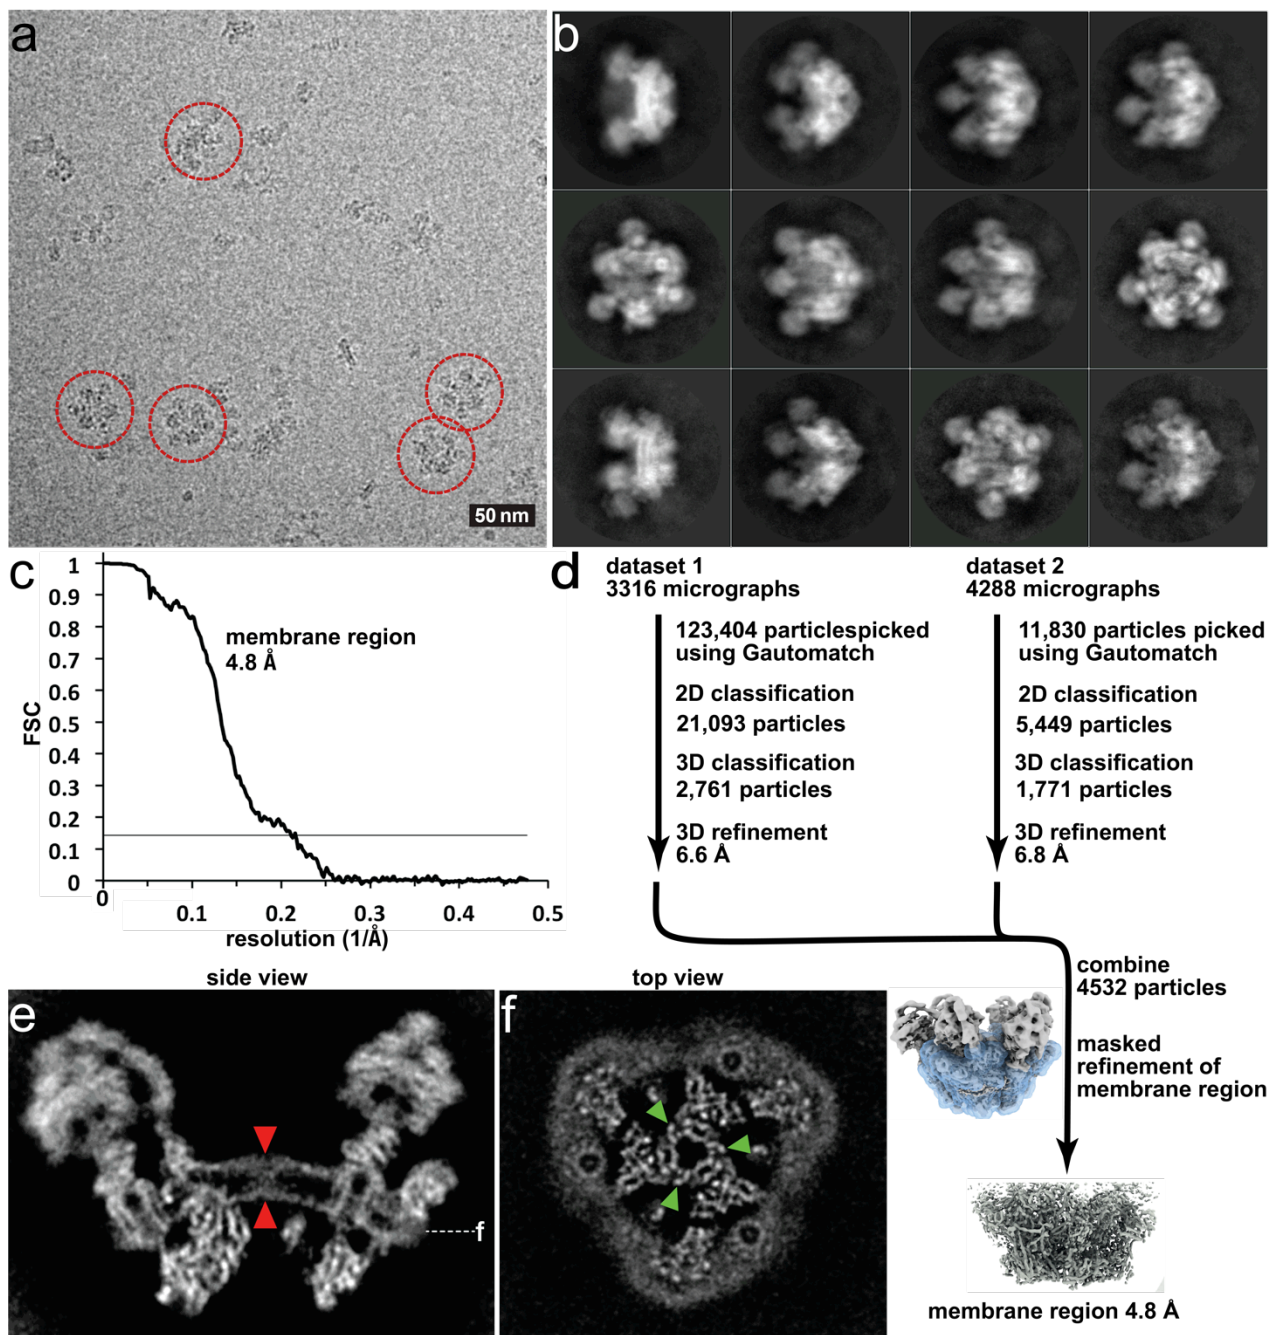

**Supplementary Fig. 2 | Cryo-EM data processing of the ATP synthase hexamer.**

**a** Representative micrograph. **b** 2D class averages. **c** Fourier Shell Correlation (FSC) curve showing the estimated resolutions of ATP synthase hexamer map. **d** Data processing scheme resulting in one final hexamer map. **e** Slice through the hexamer map (side view), central membrane bilayer is indicated. **f** Slice through the hexamer map (top view), ATP synthase copies are indicated.

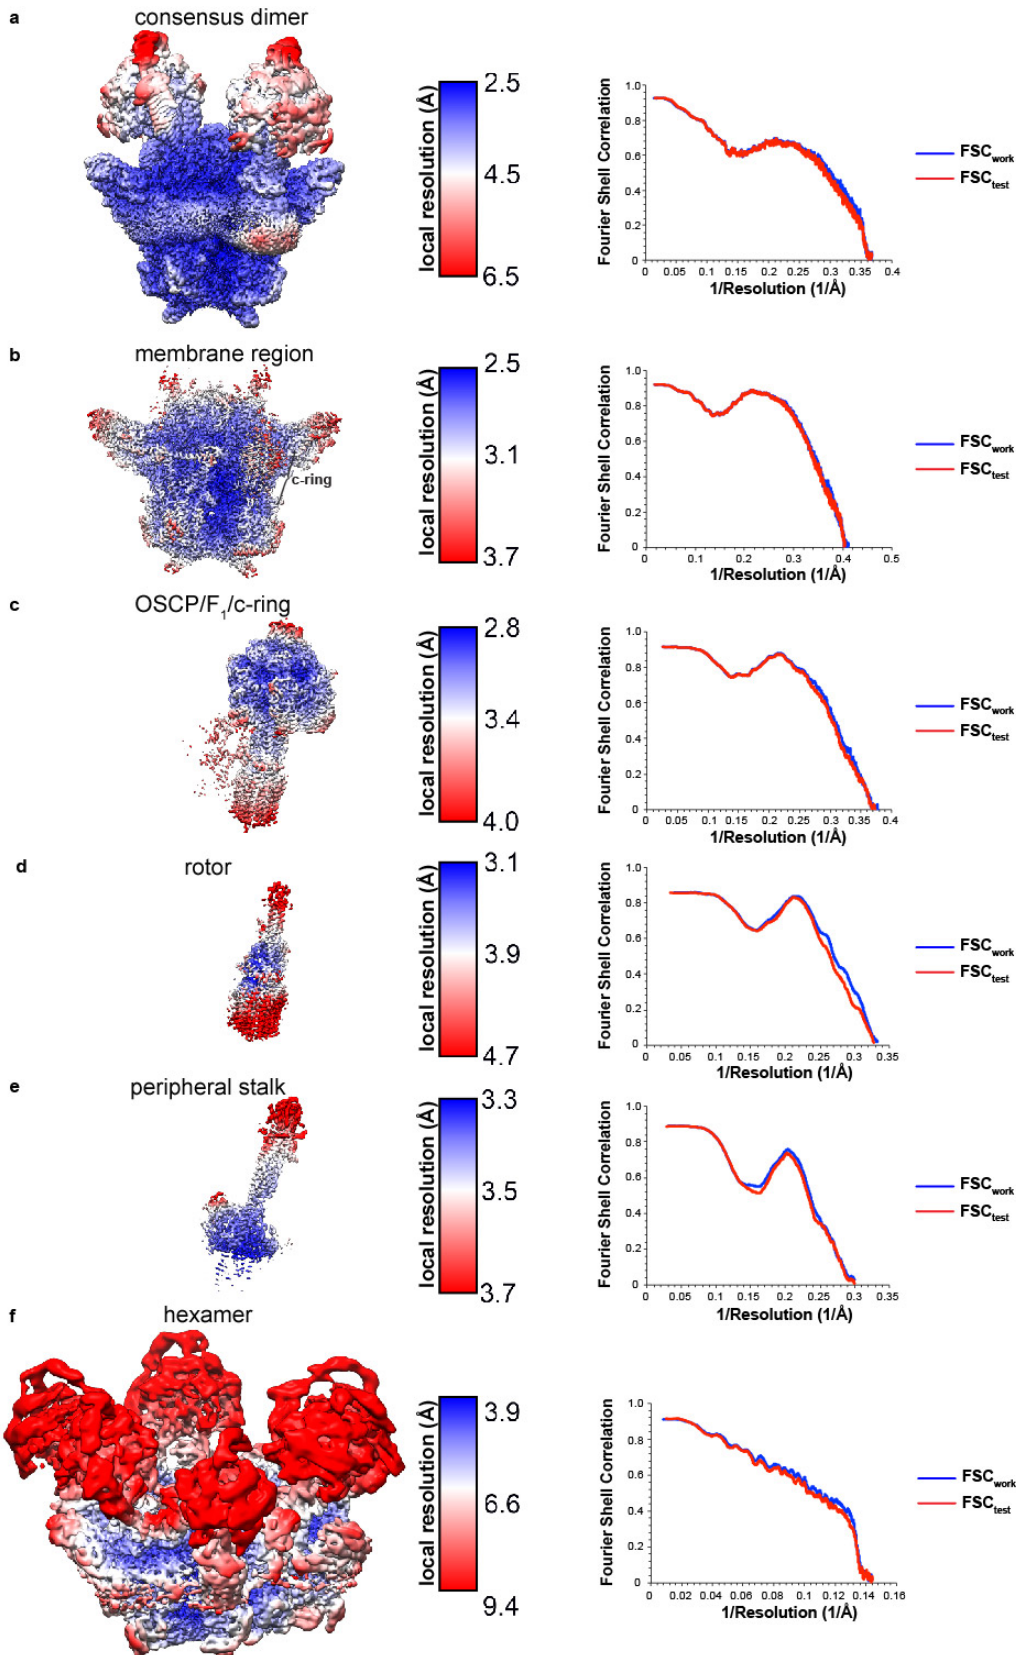

**Supplementary Figure 3 | Local resolution estimation and model validation.**

Left column shows cryo-EM maps colored according to local resolution as estimated by RELION. Right column shows Fourier shell correlations FSC<sub>work</sub> and FSC<sub>test</sub> for validation of models built and refined into the respective maps. **a** Consensus dimer. **b** Membrane region. **c** OSCP/F<sub>1</sub>/c-ring. **d** Rotor. **e** Peripheral stalk. **f** Hexamer.

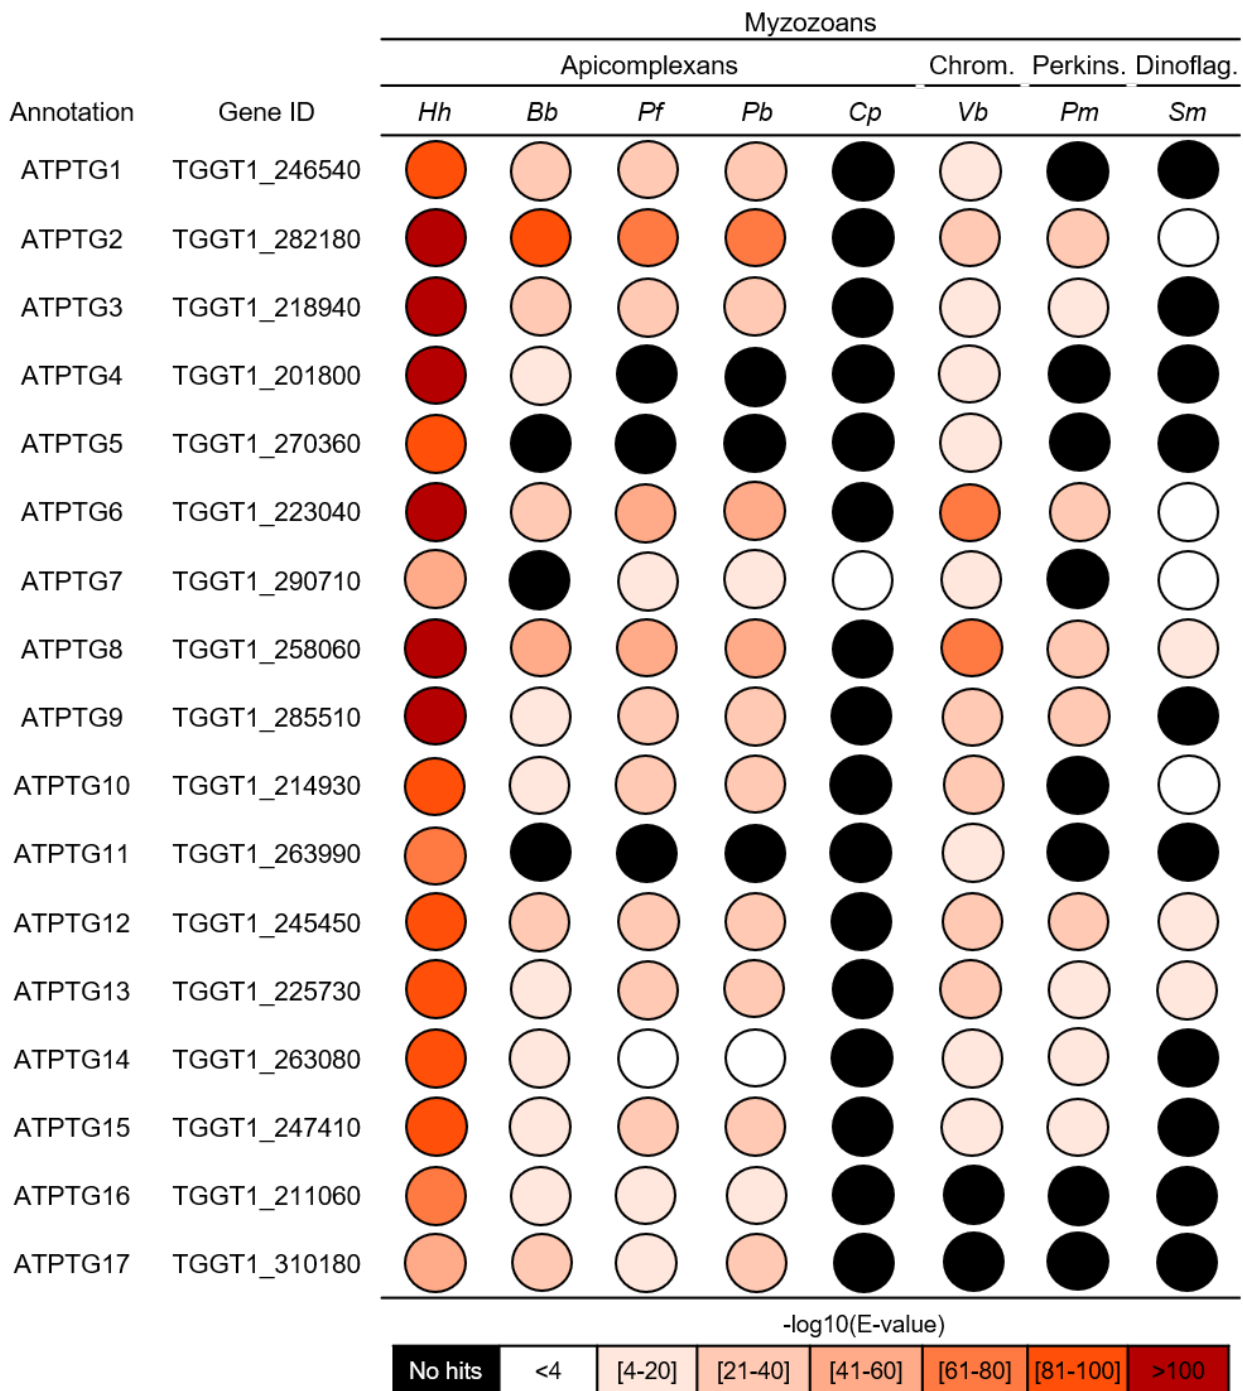

**Supplementary Fig. 4 | Conservation of *T. gondii* ATP synthase subunits in Myzozoa.** Identified subunits are coloured according to similarity score, represented as  $-\log_{10}$  (E-value). Chrom., Chromerida; Perkins., Perkinsozoa; Dinoflag., Dinoflagellata. *Hh*: *Hammondia hammondi*; *Bb*: *Babesia bovis*; *Pf*: *Plasmodium falciparum*; *Pb*: *Plasmodium berghei*; *Cp*: *Cryptosporidium parvum*; *Vb*: *Vitrella brassicaformis*; *Pm*: *Perkinsus marinus*; *Sm*: *Symbiodinium microadriaticum*. All subunits are found in at least one apicomplexan species, but none is confidently identified in *C. parvum* (an apicomplexan possessing mitosomes). Additional identified Sarcocystidae homologs not shown for clarity; see Supplementary Fig. 10.

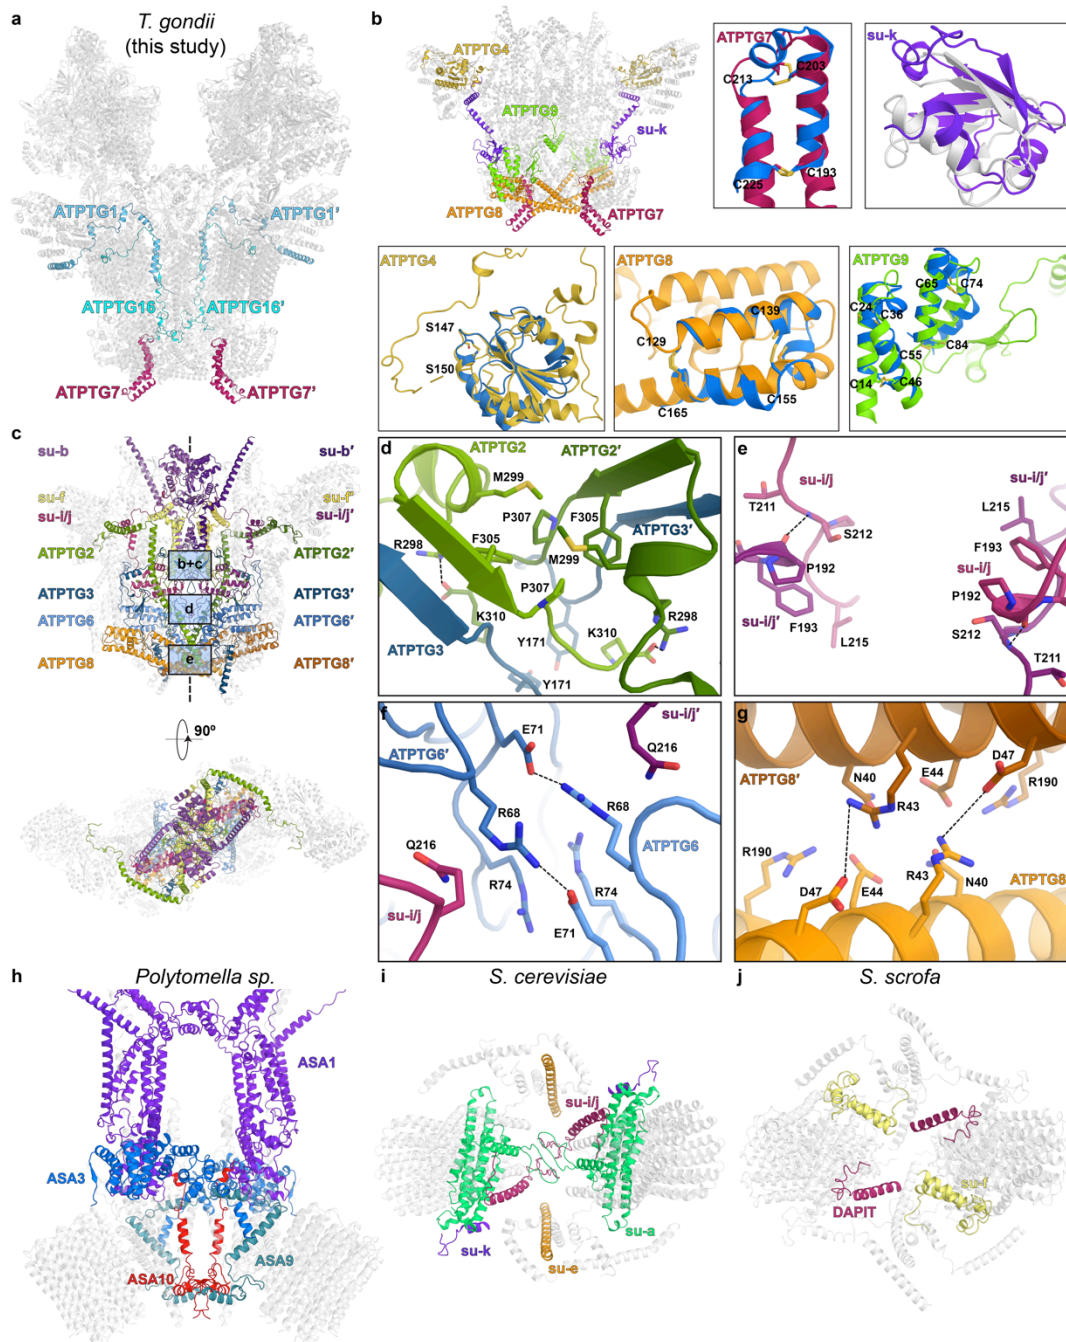

**Supplementary Fig. 5 | Subunits and interactions at the dimer interface.** **a** Subunits newly identified from the cryo-EM map. **b**  $F_0$  subunits adopting compact folds are coloured. Close-up views show the C-terminal region of subunit-*k* adopting a ubiquitin-like fold (grey overlay, PDB 5X3P)[<http://doi.org/10.2210/pdb5X3P/pdb>] on the luminal side, ATPTG4 adopts a thioredoxin-like fold in the wing region (blue overlay, PDB 2TRX) [<http://doi.org/10.2210/pdb2TRX/pdb>] and ATPTG7-9 contain CHCHDs, characterised by two  $CX_9C$  motifs (blue overlays, PDB 2LQL)[<http://doi.org/10.2210/pdb2LQL/pdb>], some of which form disulfide bonds. **c**  $F_0$  subcomplex with subunits participating in the dimer interface coloured. Interfaces along the  $C_2$  symmetry axis are indicated. **d-g** Close-up view of dimer interface interactions between ATPTG2 and ATPTG3 (**d**), subunit-*i/j* (**e**), ATPTG6 (**f**), ATPTG8 (**g**). **h-j** Subunits involved in dimer interface interactions in *Polytomella sp.* (PDB 6RD4) [<http://doi.org/10.2210/pdb6RD4/pdb>]<sup>1</sup>, *S. cerevisiae* (PDB 6B8H) [<http://doi.org/10.2210/pdb6B8H/pdb>]<sup>2</sup>, and *S. scrofa* (PDB 6J5K) [<http://doi.org/10.2210/pdb6J5K/pdb>]<sup>3</sup>.

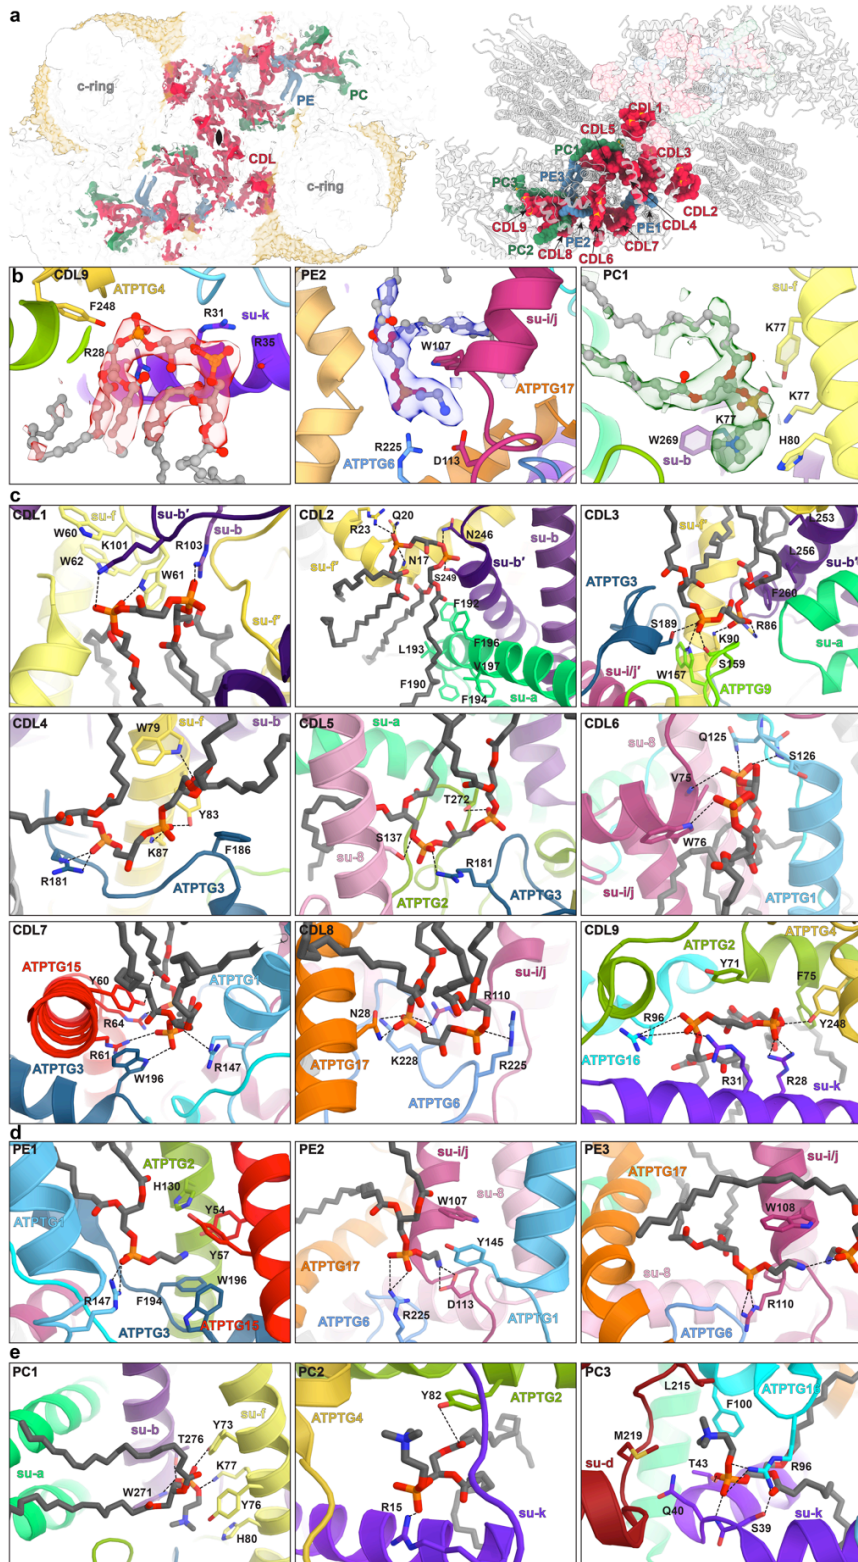

**Supplementary Fig. 6 | Native lipids are bound throughout the extended  $F_0$  region.**

**a** Top view of the membrane region cryo-EM map (left) and model (right) with bound lipids. The dimeric  $F_0$  region includes 18 cardiolipins (red), 6 phosphoethanolamines (blue) and 6 phosphocholines (green). **b** Bound lipids of each the three identified types shown with cryo-EM map density for the respective ligand. **c-e** Lipid binding sites of the cardiolipins (**c**), phosphoethanolamines (**d**), and phosphocholine (**e**); interactions with distances  $<4 \text{ \AA}$  are indicated.

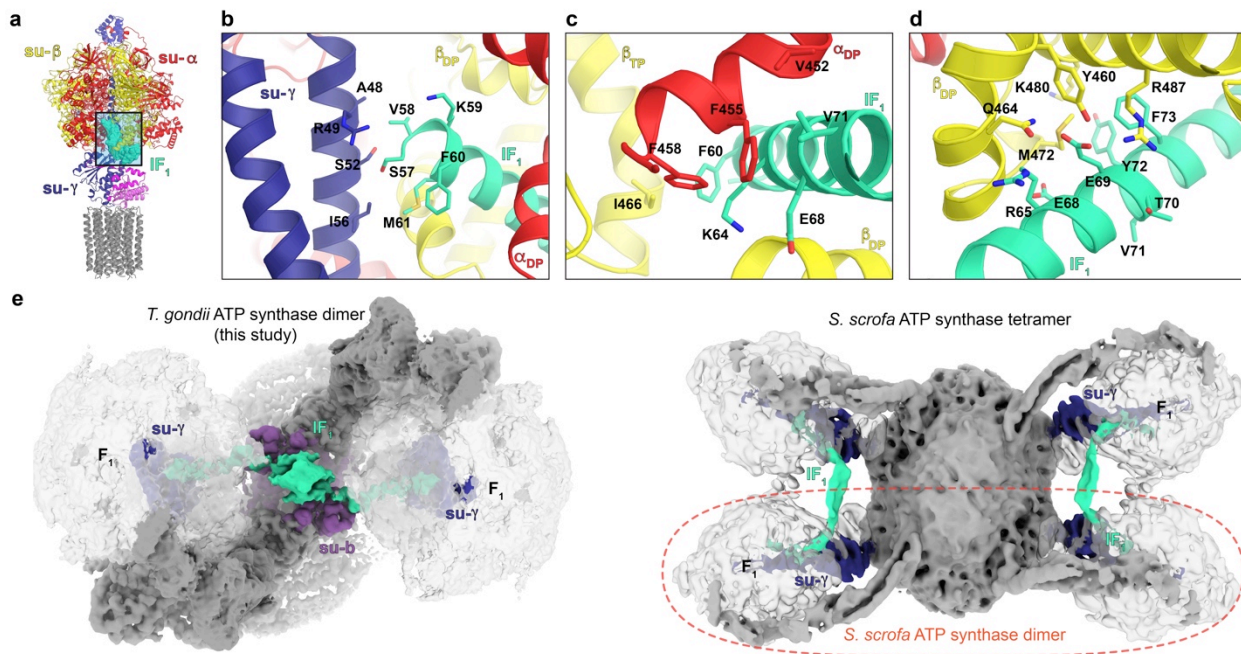

**Supplementary Fig. 7 | *T. gondii* ATP synthase dimer contains intradimeric IF<sub>1</sub>.**

**a** Model of the OSCP/F<sub>1</sub>/c-ring with bound IF<sub>1</sub> (dashed box). **b** IF<sub>1</sub>  $\alpha$ -helix extending towards the central stalk subunit- $\gamma$  in the center of F<sub>1</sub>. **c** IF<sub>1</sub> helix inserted into the ( $\alpha/\beta$ )<sub>DP</sub> interface. **d** IF<sub>1</sub> interactions with subunit- $\beta_{DP}$ . **e** Cryo-EM maps of the *T. gondii* ATP synthase dimer (current work), where IF<sub>1</sub> binds in the intra-dimeric mode and the *S. scrofa* ATP synthase tetramer (EMD-0667) [https://www.ebi.ac.uk/pdbe/entry/emdb/EMD-0667], where IF<sub>1</sub> binds in the inter-dimeric mode, and F<sub>1</sub> (transparent grey), F<sub>o</sub> (dark grey), IF<sub>1</sub> dimer (cyan), subunit- $\gamma$  (dark blue) are highlighted.



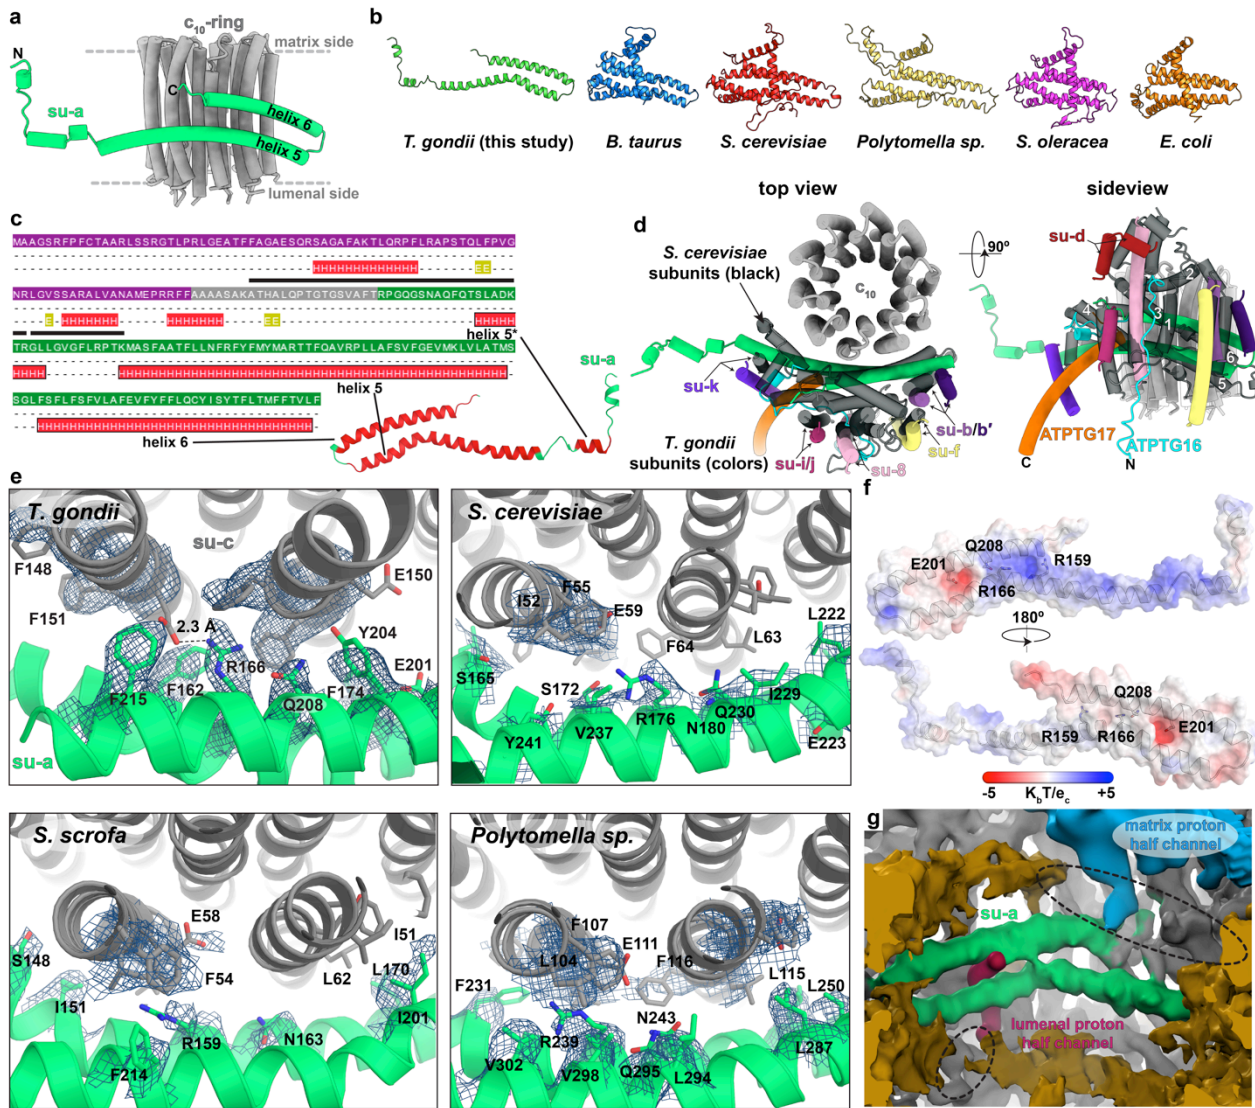

### Supplementary Fig. 8 | Minimal subunit-*a* and rotor-stator interface.

**a** The structurally conserved H5<sub>a</sub> and H6<sub>a</sub> form interface with the c-ring. **b** Fold comparison of subunit-*a*. **c** Secondary structure prediction of *T. gondii* subunit-*a*, mt-signal sequence is purple. Modelled and unmodelled regions are green and grey, respectively. Black lines indicate the two peptides detected by previous mass spectrometry studies<sup>4,5</sup>. **d** Two views of the rotor-stator interface show structurally conserved subunits associated with the subunit-*a*. The superimposed *S. cerevisiae* structure<sup>2</sup> is transparent grey. **e** Comparison of subunit-*a*/c interfaces with other organisms shows that it contains fewer aromatic residues surrounding the central arginine/glutamate pair. **f** Electrostatic surface potential map of subunit-*a* highlighting the acidic patch around residue Glu201<sub>a</sub> where protons exit the luminal proton half-channel onto the c-ring. **g** Proton half-channels shown in red (luminal) and blue (matrix), and compared to gaps (dotted black circles) in detergent density (dark gold) of the cryo-EM density map of the hexamer.

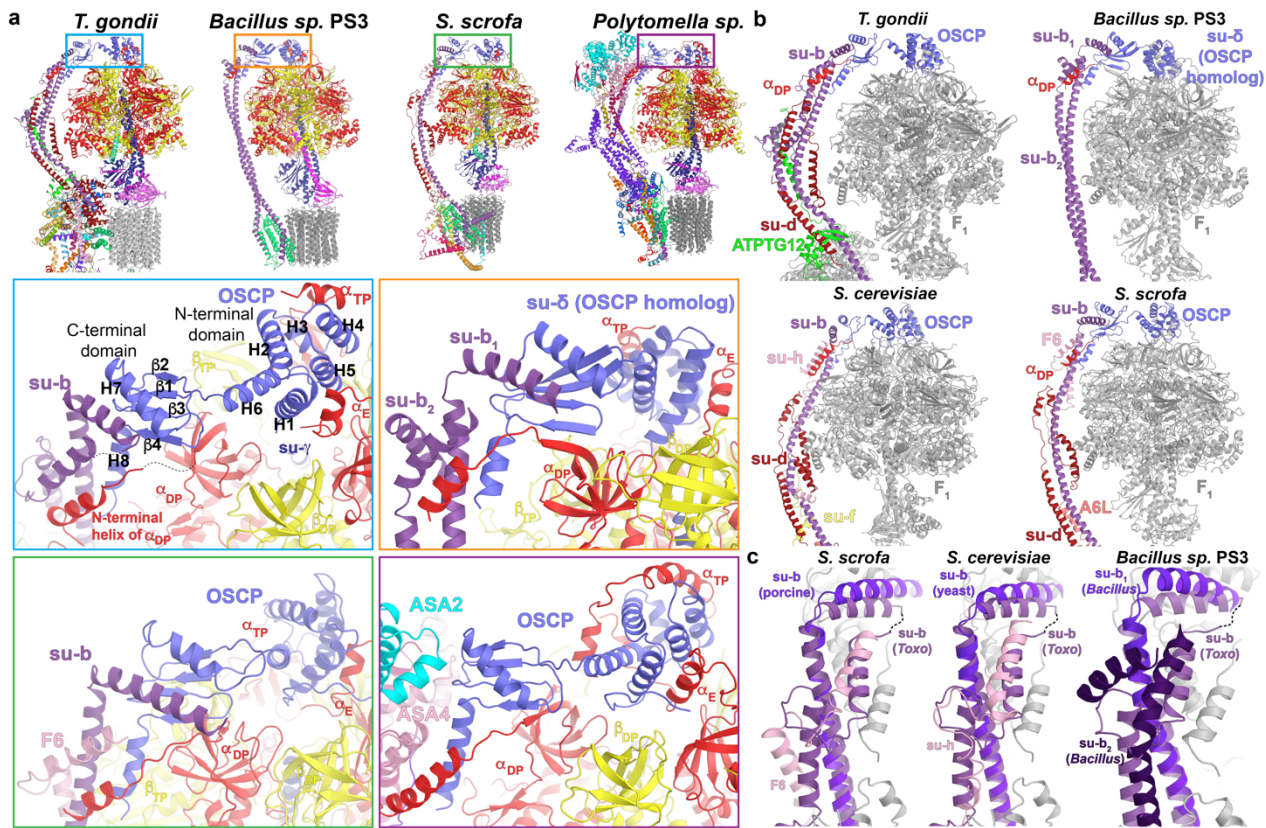

### Supplementary Fig. 9 | Peripheral stalk and F<sub>1</sub> attachment.

**a** ATP synthase structures of *T. gondii* (this study), *Bacillus* PS3 (PDB 6N2Y) [<http://doi.org/10.2210/pdb6N2Y/pdb>], *S. scrofa* (PDB 6J5I) [<http://doi.org/10.2210/pdb6J5I/pdb>] and *Polytomella sp.* (PDB 6RD9) [<http://doi.org/10.2210/pdb6RD9/pdb>] with color-coded insets showing close-up views of the OSCP region. In the parasite, bacterial and porcine complexes, attachment of OSCP to the peripheral stalk occurs via a structurally conserved interaction to subunit-*b*, which is absent in *Polytomella*. **b** View of the F<sub>1</sub> and peripheral stalk of ATP synthases from *T. gondii*, *Bacillus* PS3 (PDB 6N2Y), *S. cerevisiae* (PDB 6CP6) [<http://doi.org/10.2210/pdb6CP6/pdb>] and *S. scrofa* (PDB 6J5I). **c** Superposition of the peripheral stalk shows that the C-terminal helix of *T. gondii* subunit-*b* superimposes closely with F6 and subunit-*h*, but not with the bacterial subunit-*b*<sub>2</sub>, which has opposite topology.

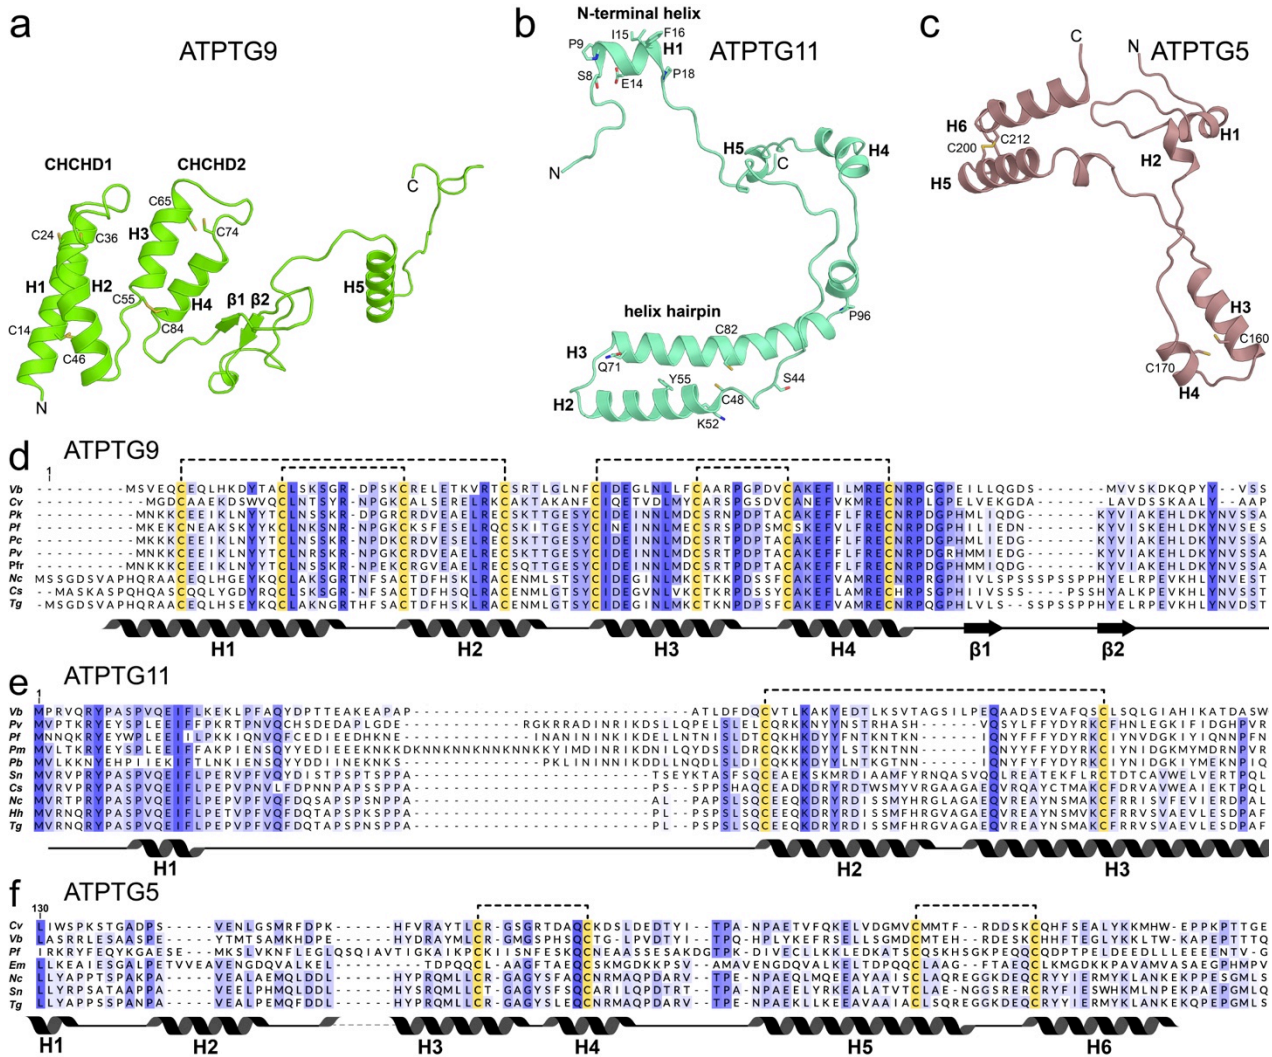

### Supplementary Fig. 10 | Subunits of the hexamer interface are conserved in apicomplexan parasites.

**a-c** Structures of ATPTG9 (a) ATPTG11 (b) and ATPTG5 (c) with conserved residues indicated. ATPTG9 contains two CHCHD domains with a cysteine pair each. ATPTG11 contains a central cysteine pair in the helix hairpin mediating hexamer contacts. ATPTG5 contains two helix hairpins with one cysteine pair each. **d-f** Sequence alignments of ATPTG9 (d) ATPTG11 (e) and ATPTG5 (f) to protein sequences from different Apicomplexa, with conserved cysteines highlighted in yellow. Apicomplexan species: *Pk*, *Plasmodium knowlesi*; *Pf*, *Plasmodium falciparum*; *Pc*, *Plasmodium cynomolgi*; *Pv*, *Plasmodium vivax*; *Pfr*, *Plasmodium fragile*; *Pm*, *Plasmodium malariae*; *Pb*, *Plasmodium berghei*; *Nc*, *Neospora caninum*; *Sn*, *Sarcocystis neurona*; *Cs*, *Cystoisospora suis*; *Hh*, *Hammondia hammondi*; *Tg*, *Toxoplasma gondii*; and the non-parasitic alveolates: *Vb*, *Vitrella brassicaformis*; *Cv*, *Chromera velia*. Numbering and secondary structure annotations refer to *Toxoplasma gondii*.

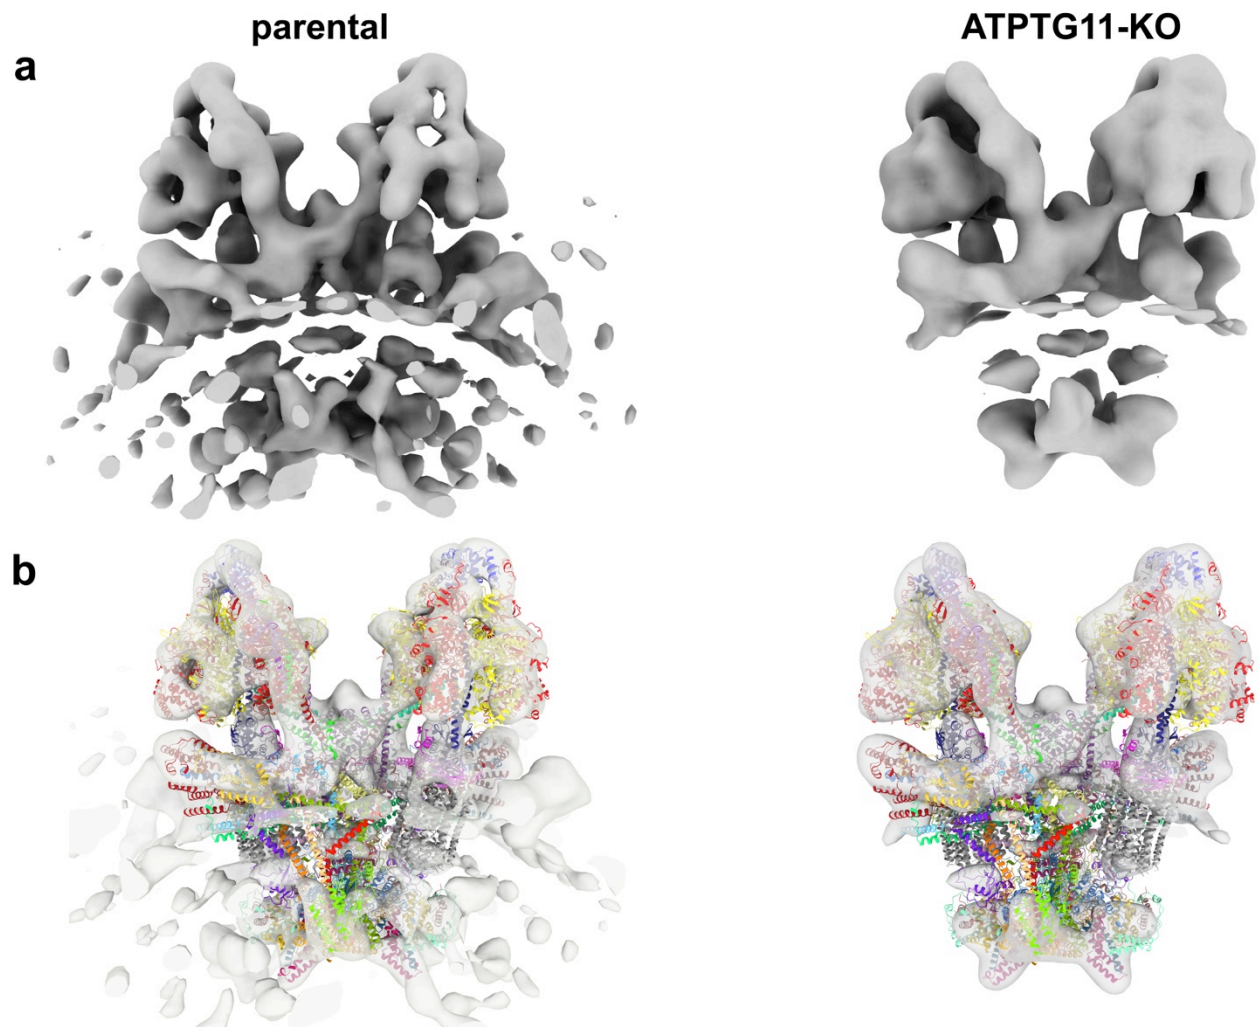

**Supplementary Fig 11 | Subtomogram averages of *T. gondii* ATP synthase from parental and ATPTG11-KO mitochondrial membranes.**

**a.** Subtomogram average maps of the dimers from parental (left), and ATPTG11-KO (right) membranes. **b** Subtomogram averages (transparent) with the atomic model fitted.

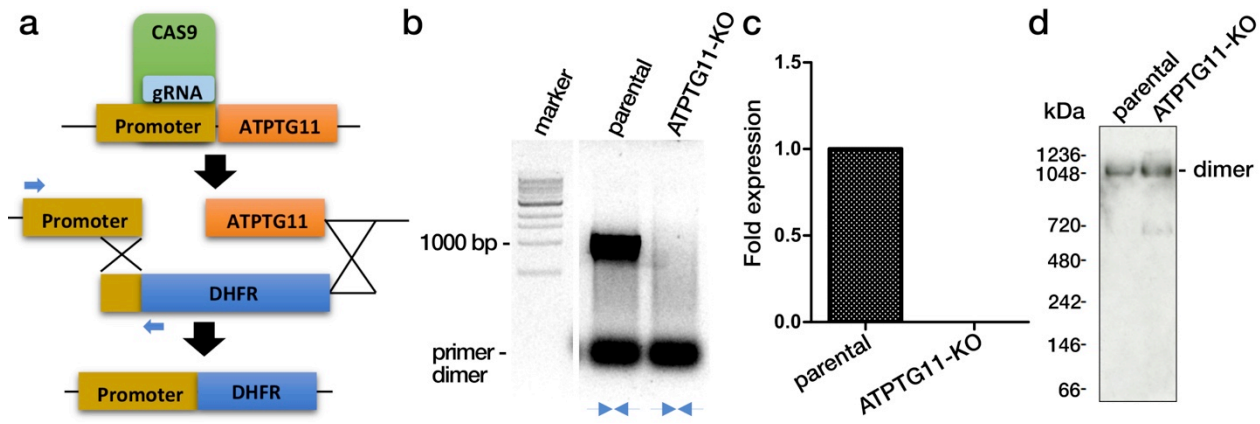

**Supplementary Fig. 12 | ATP synthase dimers are formed in ATPTG11-KO.**

**a** Schematic of genetic manipulation resulting in ATPTG11 knockout. Primers used for confirmation of insertion (generating a 1000-bp product only from knockout) shown as blue arrows. **b** Confirmation of the genetic manipulation of ATPTG11 locus via PCR. **c** Confirmation of absence of ATPTG11 mRNA in KO-strain via qRT-PCR. **d** Detection of ATP synthase dimers via native gel electrophoresis and western blotting using anti-ATP- $\beta$  antibody.

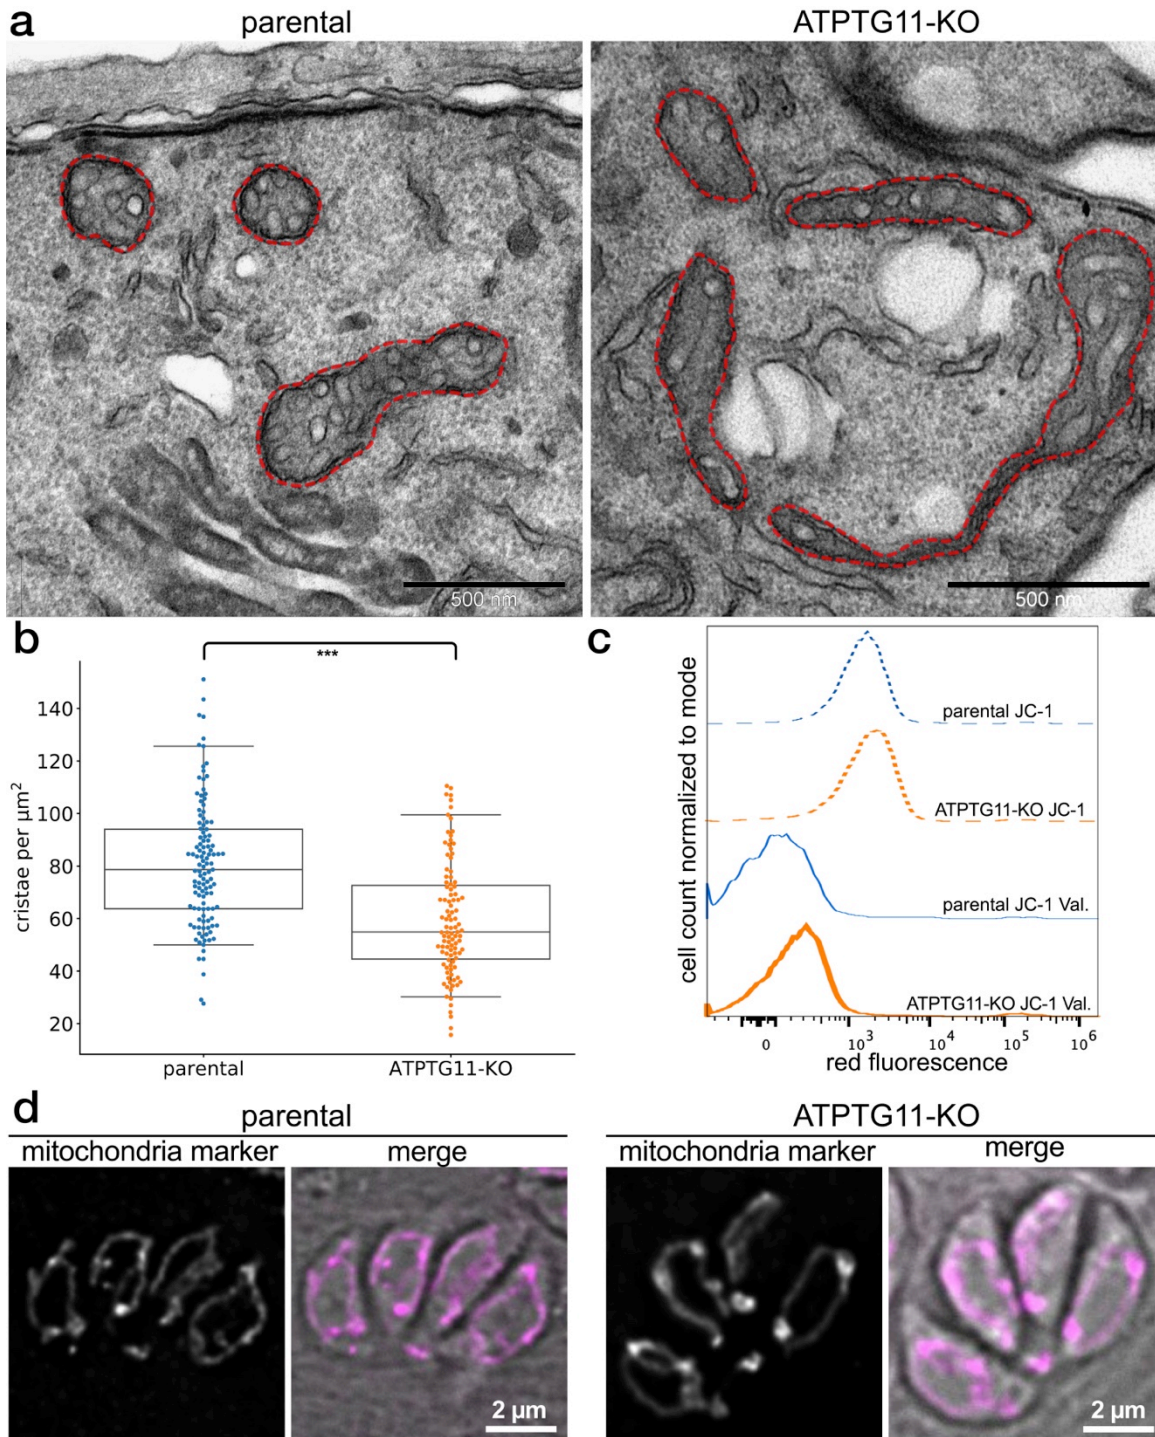

**Supplementary Fig. 13 | Characterisation of the ATPTG11-KO line.**

**a** Transmission electron microscopy of thin sections of *T. gondii* with mitochondria outlined (red dashed lines), showing cristae morphology. **b** Analysis of the number of cristae cross-sections per mitochondrial surface area for the parental and ATPTG11-KO strain. Box plot bounds range from first to third quartile with centre line indicating median; whiskers indicate 5/95th percentiles. \*\*\* $p=2.24 \times 10^{-10}$  by two-tailed Mann-Whitney test,  $n=118/104$  mitochondria examined in parental and ATPTG11-KO, respectively. **c** Fluorescent flow cytometry analysis of *T. gondii* stained with the dye JC-1 indicated that both lines possess a mitochondrial membrane potential (parental blue, ATPTG11-KO orange; dotted), which is sensitive to the ionophor valinomycin (parental blue, ATPTG11-KO orange line). **d** Immunofluorescence light microscopy of the mitochondrial marker TgMys showing the lasso-shaped ultrastructure in both lines.

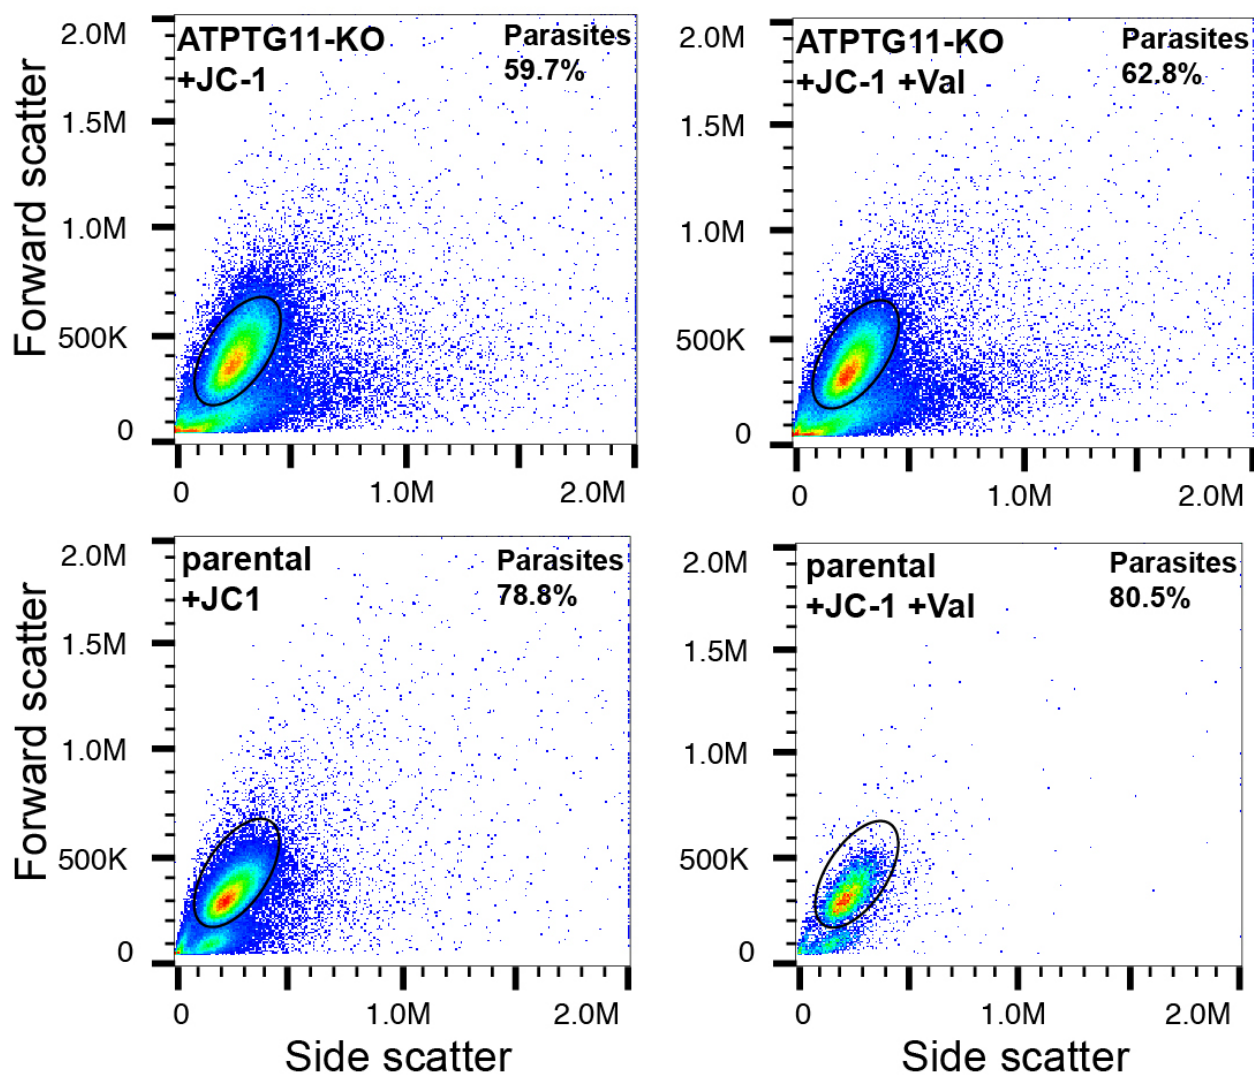

**Supplementary Fig. 14 | Gating strategy for fluorescent flow cytometry experiments.**

Each graph shows the forward scatter and side scatter plots of the entire population captured for each of the experiments shown in Supplementary Fig. 13C analysis. Oval gates were generated manually using FlowJo software (FlowJo LLC) to gate on the parasite population and separate it from host cell debris. The gated parasite populations (% from total event shown on the top left of each graph) were subsequently analysed for red fluorescence in the graphs shown in Supplementary Fig. 13C. The graphs for ATPTG11-KO+JC-1, parental+JC-1, ATPTG11-KO+JC-1+valinomycin and parental+JC-1+valinomycin represent n=5/8/2/8 biological replicates, respectively.

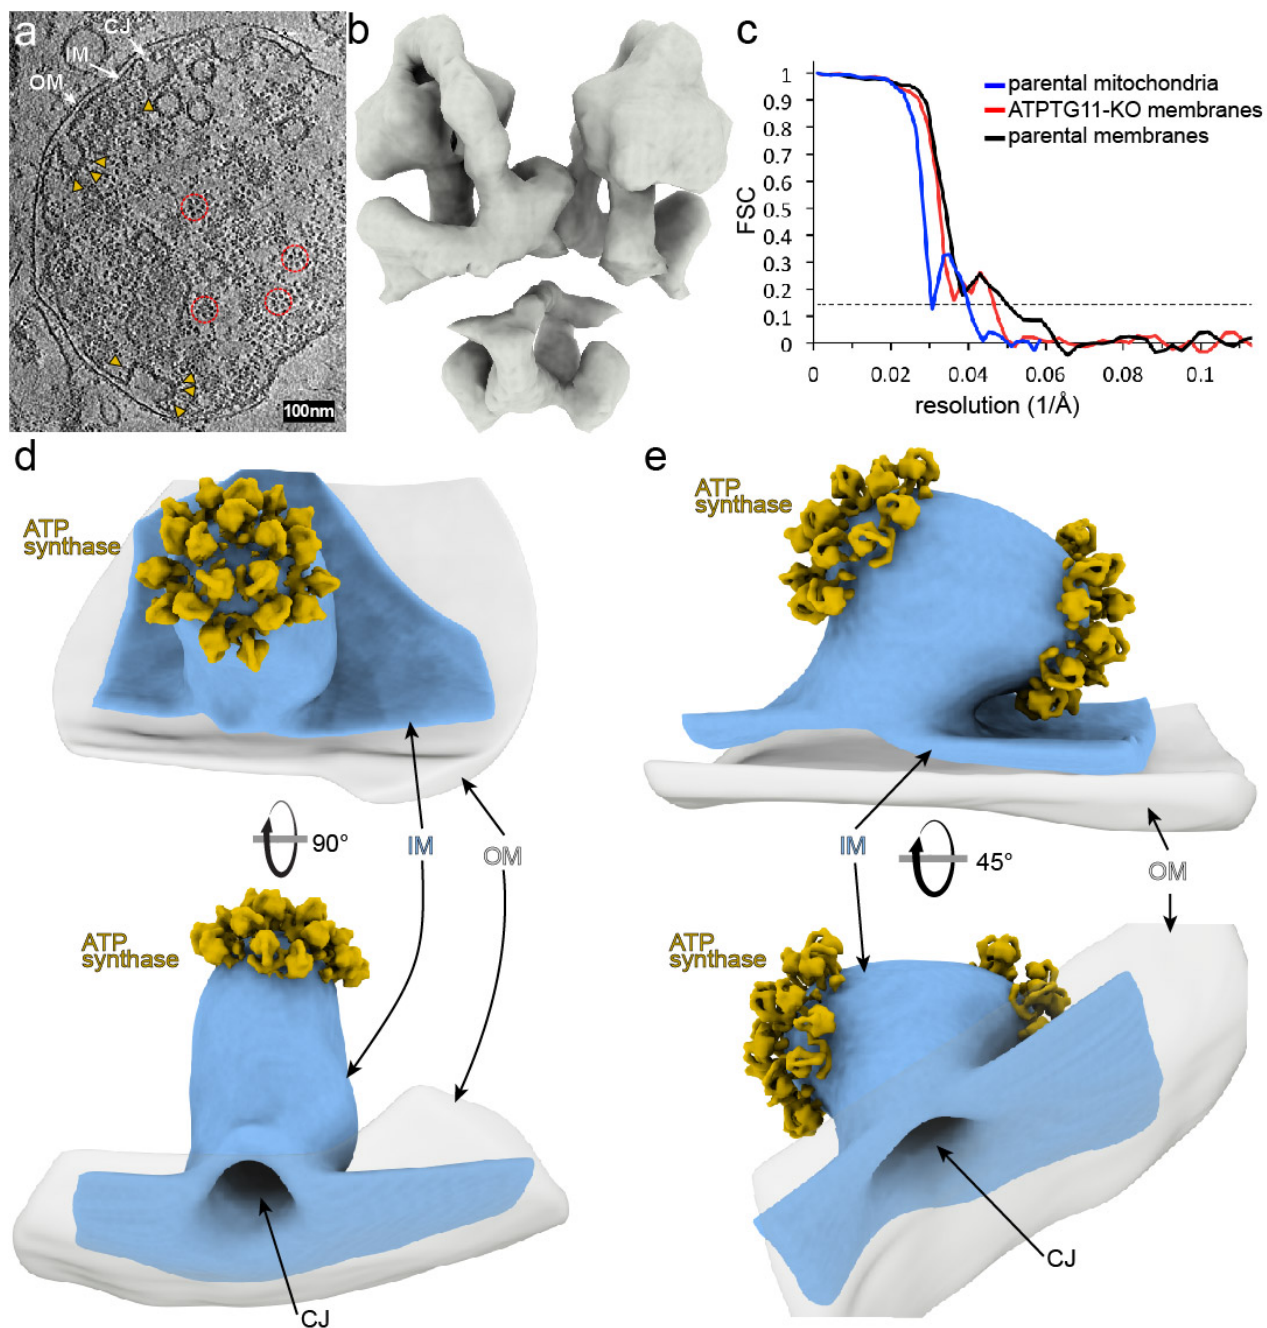

**Supplementary Fig. 15 | Electron cryo-tomography of *T. gondii* mitochondria shows formation of pentagonal pyramid arrays *in organello*.**

**a** Tomographic slice through a *T. gondii* mitochondrion, ATP synthase (yellow arrowheads) decorate the apical region of the cristae membranes. Top views of ATP synthase hexamers are highlighted with red circles (IM: inner membrane; OM: outer membrane; CJ: crista junction). **b** Subtomogram average of the ATP synthase dimer. **c** Fourier shell correlation (FSC) of the subtomogram averages; dashed line is 0.143-cutoff. **d,e** Subtomogram averages and segmented cristae (blue) showing ATP synthase pentagonal pyramid arrays (yellow) on the apices of the inner membrane.



**Supplementary Table 1. Cryo-EM data collection, refinement and validation statistics.**

|                                            | F <sub>0</sub> dimer | OSCP/F <sub>1</sub> -c-ring | Peripheral stalk | Rotor          | F <sub>1</sub> F <sub>0</sub> dimer | F <sub>1</sub> F <sub>0</sub> hexamer |
|--------------------------------------------|----------------------|-----------------------------|------------------|----------------|-------------------------------------|---------------------------------------|
| <b>Data collection</b>                     |                      |                             |                  |                |                                     |                                       |
| Microscope                                 | Titan Krios          |                             |                  |                |                                     | Titan Krios                           |
| Voltage (kV)                               | 300                  |                             |                  |                |                                     | 300                                   |
| Camera                                     | K2 Summit            |                             |                  |                |                                     | K2 Summit                             |
| Magnification                              | 165,000              |                             |                  |                |                                     | 130,000                               |
| Exposure (e <sup>-</sup> /Å <sup>2</sup> ) | 41.5                 |                             |                  |                |                                     | 32                                    |
| Defocus range (μm)                         | 1.0-3.8              |                             |                  |                |                                     | 1.2-4.0                               |
| Pixel size (Å)                             | 0.85                 |                             |                  |                |                                     | 1.05                                  |
| Movies collected                           | 4860                 |                             |                  |                |                                     | 7604                                  |
| Frames per movie                           | 20                   |                             |                  |                |                                     | 20                                    |
| <b>Data processing</b>                     |                      |                             |                  |                |                                     |                                       |
| Initial particles                          | 275,030              |                             |                  |                |                                     | 26,542                                |
| Final no. particles                        | 101,505              | 203,010                     | 203,010          | 203,010        | 101,505                             | 4,532                                 |
| Symmetry                                   | C <sub>2</sub>       | C <sub>1</sub>              | C <sub>1</sub>   | C <sub>1</sub> | C <sub>2</sub>                      | C <sub>3</sub>                        |
| Resolution (Å)*                            | 2.8                  | 3.1                         | 3.5              | 3.5            | 2.9                                 | 4.8                                   |
| Sharpening factor                          | B -75                | -98                         | -112             | -132           | -79                                 | -131                                  |
| EMDB ID                                    | <b>10520</b>         | <b>10521</b>                | <b>10522</b>     | <b>10523</b>   | <b>10524</b>                        | <b>10525</b>                          |
| <b>Model refinement statistics</b>         |                      |                             |                  |                |                                     |                                       |
| CC (map/model)                             | 0.85                 | 0.85                        | 0.77             | 0.83           | 0.66                                | 0.45                                  |
| Resolution (map/model)                     | 2.70                 | 3.05                        | 3.93             | 3.57           | 3.0                                 | 9.0                                   |
| No. of atoms (no H)                        | 121,096              | 65,413                      | 9,606            | 18,084         | 266,864                             | 776,996                               |
| No. of residues                            | 7,122                | 4,264                       | 605              | 1,204          | 16,596                              | 49,776                                |
| No. of lipids                              | 44                   | -                           | -                | -              | 44                                  | -                                     |
| No. of ATP/ADP                             | -                    | 3/2                         | -                | -              | 6/4                                 | -                                     |
| No. of Mg ions                             | -                    | 5                           | -                | -              | 10                                  | -                                     |
| B-factor (Å <sup>2</sup> )                 | -----                |                             |                  |                |                                     |                                       |
| - protein                                  | 41.24                | 50.62                       | 102.30           | 56.53          | 48.38                               | 49.64                                 |
| - lipids                                   | 37.08                | -                           | -                | -              | 38.36                               | -                                     |
| - ATP/ADP                                  | -                    | 31.68                       | -                | -              | 38.36                               | -                                     |
| Rotamer outliers (%)                       | 0.69                 | 0.29                        | 0.58             | 0.00           | 0.25                                | 0.01                                  |
| Ramachandran (%)                           | -----                |                             |                  |                |                                     |                                       |
| - outliers                                 | 0.00                 | 0.00                        | 0.00             | 0.00           | 0.02                                | 0.04                                  |
| - allowed                                  | 2.85                 | 4.55                        | 9.98             | 8.69           | 3.73                                | 4.46                                  |
| - favored                                  | 97.15                | 95.45                       | 90.02            | 91.31          | 96.25                               | 95.51                                 |
| Clash score                                | 1.30                 | 2.61                        | 3.54             | 2.43           | 1.87                                | 2.00                                  |
| MolProbity score                           | 1.01                 | 1.36                        | 1.69             | 1.54           | 1.20                                | 1.28                                  |
| RMSD                                       | -----                |                             |                  |                |                                     |                                       |
| - bonds (Å)                                | 0.004                | 0.006                       | 0.004            | 0.006          | 0.004                               | 0.002                                 |
| - angles (°)                               | 0.554                | 0.588                       | 0.594            | 0.600          | 0.576                               | 0.567                                 |
| EMRinger score                             | 4.49                 | 3.59                        | 1.38             | 2.54           | 3.15                                | 0.54                                  |
| PDB ID                                     | <b>6TMG</b>          | <b>6TMH</b>                 | <b>6TMI</b>      | <b>6TMJ</b>    | <b>6TMK</b>                         | <b>6TML</b>                           |

**Supplementary Table 2: *T. gondii* ATP synthase subunit composition**

| Subunit                                            | Previous nomenclature <sup>4</sup> | Previous nomenclature <sup>5</sup> | Gene entry   | Uniprot ID | Predicted length (aa) | Residues built | M <sub>w</sub> modeled (Da) | Comments                                                                                                                           |
|----------------------------------------------------|------------------------------------|------------------------------------|--------------|------------|-----------------------|----------------|-----------------------------|------------------------------------------------------------------------------------------------------------------------------------|
| <b>F<sub>1</sub>-subcomplex:</b>                   |                                    |                                    |              |            |                       |                |                             |                                                                                                                                    |
| α                                                  | α                                  | α                                  | TGGT1_204400 | S7UU80     | 577                   | 53-564         | 55910                       |                                                                                                                                    |
| β                                                  | β                                  | β                                  | TGGT1_261950 | A0A125YYY4 | 560                   | 79-557         | 51771                       | attempts to isolate KO in <i>P. falciparum</i> were unsuccessful ; KO in <i>P. berghei</i> is lethal in the ookinetes <sup>6</sup> |
| γ                                                  | γ                                  | γ                                  | TGGT1_231910 | A0A125YUH0 | 314                   | 42-313         | 30257                       | attempts to isolate KO in <i>P. falciparum</i> were unsuccessful <sup>6</sup>                                                      |
| δ                                                  | δ                                  | δ                                  | TGGT1_226000 | A0A125YRE2 | 183                   | 41-183         | 15256                       |                                                                                                                                    |
| ε                                                  | ε                                  | ε                                  | TGGT1_314820 | S7VV10     | 73                    | 1-65           | 7686                        |                                                                                                                                    |
| OSCP                                               | OSCP                               | OSCP                               | TGGT1_284540 | A0A125YKG0 | 252                   | 73-252         | 20134                       |                                                                                                                                    |
| <b>Inhibitor of F<sub>1</sub> (IF<sub>1</sub>)</b> | putative IF1                       | -                                  | TGGT1_215350 | A0A125YJP2 | 145                   | 57-96          | 4777                        |                                                                                                                                    |
| <b>F<sub>0</sub>-subcomplex:</b>                   |                                    |                                    |              |            |                       |                |                             |                                                                                                                                    |
| a                                                  | putative a                         | ASAP-1                             | TGGT1_31036  | A0A125YSJ0 | 224                   | 108-224        | 13439                       |                                                                                                                                    |

|         |             |         |                   |                |     |                              |       |                                       |
|---------|-------------|---------|-------------------|----------------|-----|------------------------------|-------|---------------------------------------|
|         |             |         | 0                 |                |     |                              |       |                                       |
| b       | ICAP2       | ASAP-2  | TGGT1_23141<br>0  | A0A125YF7      | 571 | 83-571                       | 55742 |                                       |
| c       | c           | c       | TGGT1_24972<br>0  | A0A125YJV2     | 166 | 96-166                       | 7170  |                                       |
| d       | ICAP18      | ASAP-3  | TGME49_268<br>830 | S8F0X4         | 536 | 20-100, 107-<br>288, 304-507 | 53597 |                                       |
| f       | ICAP11      | ASAP-10 | TGGT1_21561<br>0  | S8ESP4         | 111 | 2-111                        | 12883 |                                       |
| i/j     | -           | ASAP-11 | TGGT1_29003<br>0  | A0A125YIW7     | 229 | 47-222                       | 21225 |                                       |
| k       | ICAP6       | ASAP-6  | TGGT1_26018<br>0  | A0A125YTD8     | 157 | 9-157                        | 17250 | PB1/UBX<br>domain                     |
| 8       | -           | ASAP-15 | TGGT1_20844<br>0  | A0A125YPQ5     | 205 | 96-191                       | 10871 |                                       |
| ATPTG1  | -           | -       | TGGT1_24654<br>0  | S7W9J5         | 398 | 32-153                       | 14523 |                                       |
| ATPTG2  | ICAP15      | ASAP-8  | TGGT1_28218<br>0  | A0A125YV77     | 310 | 42-213, 229-<br>310          | 29334 |                                       |
| ATPTG3  | ICAP8       | ASAP-7  | TGGT1_21894<br>0  | S8G8Q0         | 325 | 164-303                      | 15773 |                                       |
| ATPTG4  | -           | ASAP-16 | TGGT1_20180<br>0  | A0A125YM53     | 267 | 71-102, 112-<br>267          | 20426 | thioredoxin-<br>like fold             |
| ATPTG5  | -           | ASAP-20 | TGGT1_27036<br>0  | S8F1E8         | 252 | 115-226                      | 12542 |                                       |
| ATPTG6  | unknown     | ASAP-4  | TGGT1_22304<br>0  | S8FBB2         | 239 | 14-239                       | 26191 |                                       |
| ATPTG7  | -           | -       | TGGT1_29071<br>0  | S7VXW3         | 236 | 146-235                      | 10196 | CHCHD                                 |
| ATPTG8  | CHCH domain | -       | TGGT1_25806<br>0  | S7W7F1         | 208 | 2-208                        | 23203 | CHCHD                                 |
| ATPTG9  | CHCH domain | ASAP-9  | TGGT1_28551<br>0  | S8F8M0         | 166 | 7-166                        | 17807 | CHCHD<br>KO attempts<br>unsuccessful  |
| ATPTG10 | -           | ASAP-13 | TGGT1_21493<br>0  | A0A125YMA<br>8 | 138 | 15-122                       | 12292 |                                       |
| ATPTG11 | -           | ASAP-19 | TGGT1_26399<br>0  | A0A125YPS5     | 134 | 2-134                        | 15275 | KO line<br>generated in<br>this study |

|         |       |         |                  |            |     |        |       |  |
|---------|-------|---------|------------------|------------|-----|--------|-------|--|
| ATPTG12 | -     | ASAP-14 | TGGT1_24545<br>0 | A0A125YKF9 | 134 | 1-133  | 15251 |  |
| ATPTG13 | -     | ASAP-17 | TGGT1_22573<br>0 | A0A125YLN5 | 128 | 33-127 | 11271 |  |
| ATPTG14 | -     | ASAP-18 | TGGT1_26308<br>0 | A0A125YLI0 | 133 | 18-109 | 10281 |  |
| ATPTG15 | ICAP9 | ASAP-5  | TGGT1_24741<br>0 | A0A125YRP2 | 126 | 33-126 | 10642 |  |
| ATPTG16 | -     | -       | TGGT1_21106<br>0 | S7VTI0     | 106 | 2-105  | 10679 |  |
| ATPTG17 | -     | ASAP-12 | TGGT1_31018<br>0 | S8G3L1     | 92  | 2-83   | 9347  |  |

ATPTG1, ATPTG7 and ATPTG16 were not detected in any of the previous studies, and built *de novo* through building peptide sequences in the density map of F<sub>o</sub> and performing BLAST searches of the built sequences against the ToxoDB.

**Supplementary Table 3: Primers used in this study**

| <b>Primer name</b>                                | <b>Sequence</b>                                                              |
|---------------------------------------------------|------------------------------------------------------------------------------|
| Forward primer to clone gRNA                      | aagttGATTGCGCACCATCTTGACg                                                    |
| Reverse primer to clone gRNA                      | aaaacGTGCAAGATGGTGCACAATCa                                                   |
| Forward primer to amplify DHFR                    | ccccacgccggttcgagttggcagtcgatttctccatagcccgtgcaagaagcttcgc<br>caggctgtaaatcc |
| Reverse primer to amplify DHFR                    | CTACAAGTGGTACTTCGTTAGAATGCTCGGCACTCT<br>CCCATACTGCAGCTggatcgatcccccggtttgc   |
| Integration testing primer 1                      | GCCGTTGTGCTGCG                                                               |
| Integration testing primer 2                      | GGCCGTTGTTGATGCC                                                             |
| Actin forward primer KO verification              | GGGACGACATGGAGAAAATC                                                         |
| Actin forward primer KO verification              | AGAAAGAACGGCCTGGATAG                                                         |
| ATPTG11-KO forward primer KO verification         | CTCCACTCCCTTCTCCCTC                                                          |
| ATPTG11-KO reverse primer KO verification         | ATGGTGAAGTTCCGAGCTTG                                                         |
| Catalase forward primer competition assay         | TCCCCAACTGTTGTTACCGT                                                         |
| Catalase reverse primer competition assay         | CAGCGTTTCTGTTAATGCAG                                                         |
| ATPTG11-KO forward primer competition assay       | ACCCGTCGACAATTTGCTA                                                          |
| ATPTG11-KO reverse primer competition assay       | CCTGAGGACACCTGCTTGAT                                                         |
| Parental ATPTG11 forward primer competition assay | GACAATTTGCTAAATCCTCCC                                                        |
| Parental ATPTG11 reverse primer competition assay | CGAACTGGACAAACGGGAC                                                          |

Primers used for the generation and verification of the ATPTG11-KO line and the growth competition assay. For the primers used to clone gRNA, gRNA nucleotides are shown in uppercase, nucleotides that create restriction site in lowercase.

## Supplementary Information References

- 1 Murphy, B. J. *et al.* Rotary substates of mitochondrial ATP synthase reveal the basis of flexible F1-Fo coupling. *Science* **364**, doi:10.1126/science.aaw9128 (2019).
- 2 Guo, H., Bueler, S. A. & Rubinstein, J. L. Atomic model for the dimeric FO region of mitochondrial ATP synthase. *Science* **358**, 936-940, doi:10.1126/science.aao4815 (2017).
- 3 Gu, J. *et al.* Cryo-EM structure of the mammalian ATP synthase tetramer bound with inhibitory protein IF1. *Science* **364**, 1068-1075, doi:10.1126/science.aaw4852 (2019).
- 4 Huet, D., Rajendran, E., van Dooren, G. G. & Lourido, S. Identification of cryptic subunits from an apicomplexan ATP synthase. *eLife* **7**, doi:10.7554/eLife.38097 (2018).
- 5 Salunke, R., Mourier, T., Banerjee, M., Pain, A. & Shanmugam, D. Highly diverged novel subunit composition of apicomplexan F-type ATP synthase identified from *Toxoplasma gondii*. *PLoS Biol* **16**, e2006128, doi:10.1371/journal.pbio.2006128 (2018).
- 6 Balabaskaran Nina, P. *et al.* ATP synthase complex of Plasmodium falciparum: dimeric assembly in mitochondrial membranes and resistance to genetic disruption. *J Biol Chem* **286**, 41312-41322, doi:10.1074/jbc.M111.290973 (2011).
